# Supplementary material
Source: PubMed Central journal article supplement (PMC7787511)
Supplement: mmc1.pdf [file mmc1.pdf]

Supplementary Figure

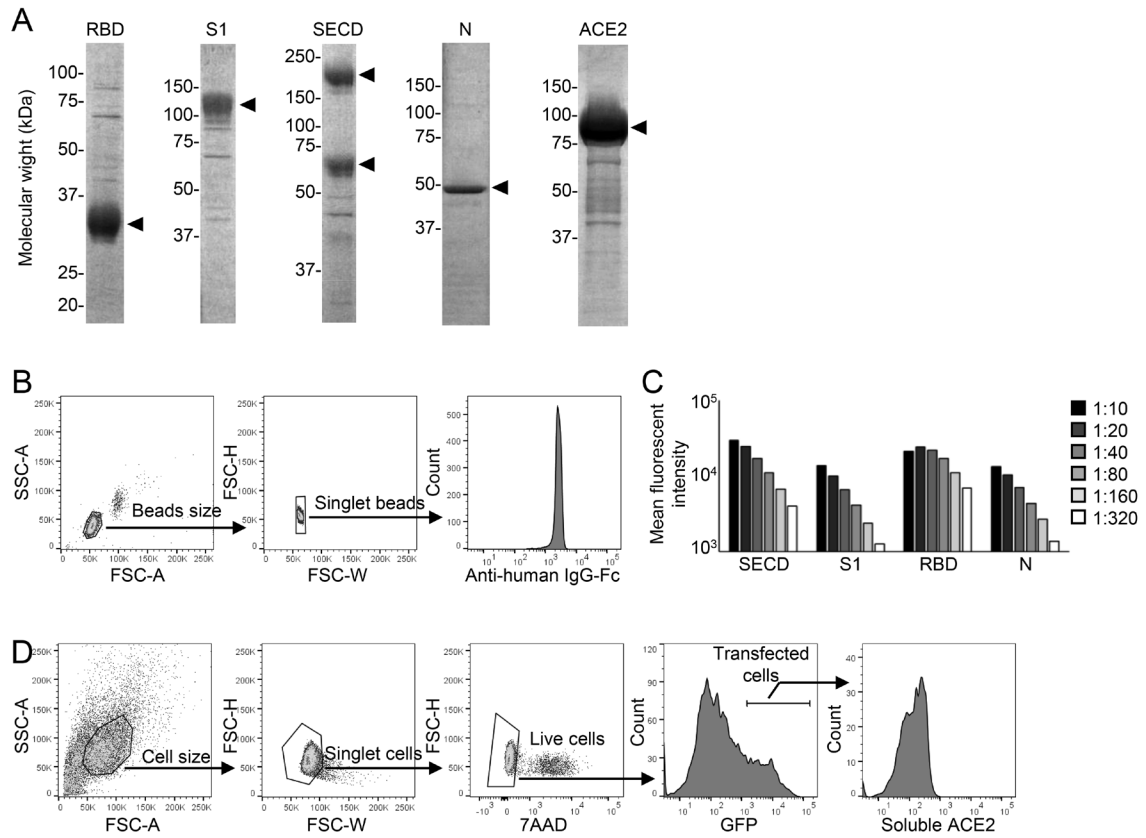

Supplementary Figure 1. Development of bead-/cell-based measurement procedures (A) The purity of the recombinant proteins (receptor binding domain (RBD), S1 domain, and extracellular domain of Spike (SECD), N protein, and soluble ACE2) are shown by Coomassie Brilliant Blue staining. SECD has an additional band of S1 truncated form (60-65kDa). (B) Representative gating strategy of bead-based procedure is shown. (C) The results of optimization of serum dilution factor are shown. We used a 1:100 dilution. (D) Representative gating strategy of cell-based Spike-ACE2 inhibition assay is shown.
